# Supplementary material for: A mutation affecting laminin alpha 5 polymerisation gives rise to a syndromic developmental disorder
Source: Oxford University Press journal article supplement (doi:10.1242/dev.189183), 2020-01-01
Supplement: dev189183supp.pdf [file dev189183supp.pdf]

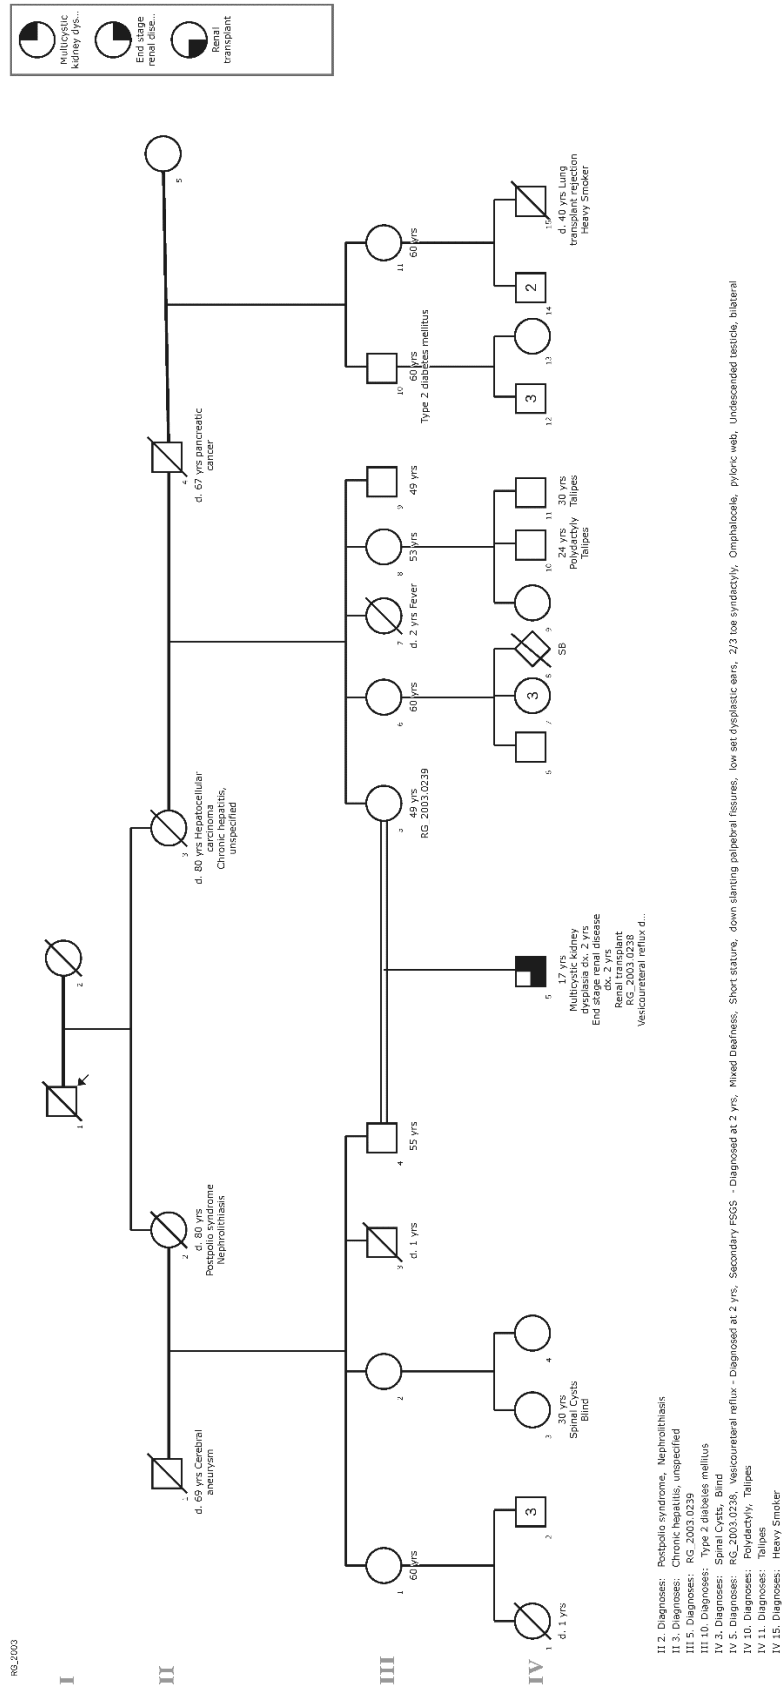

Figure S1 – Pedigree of the affected proband

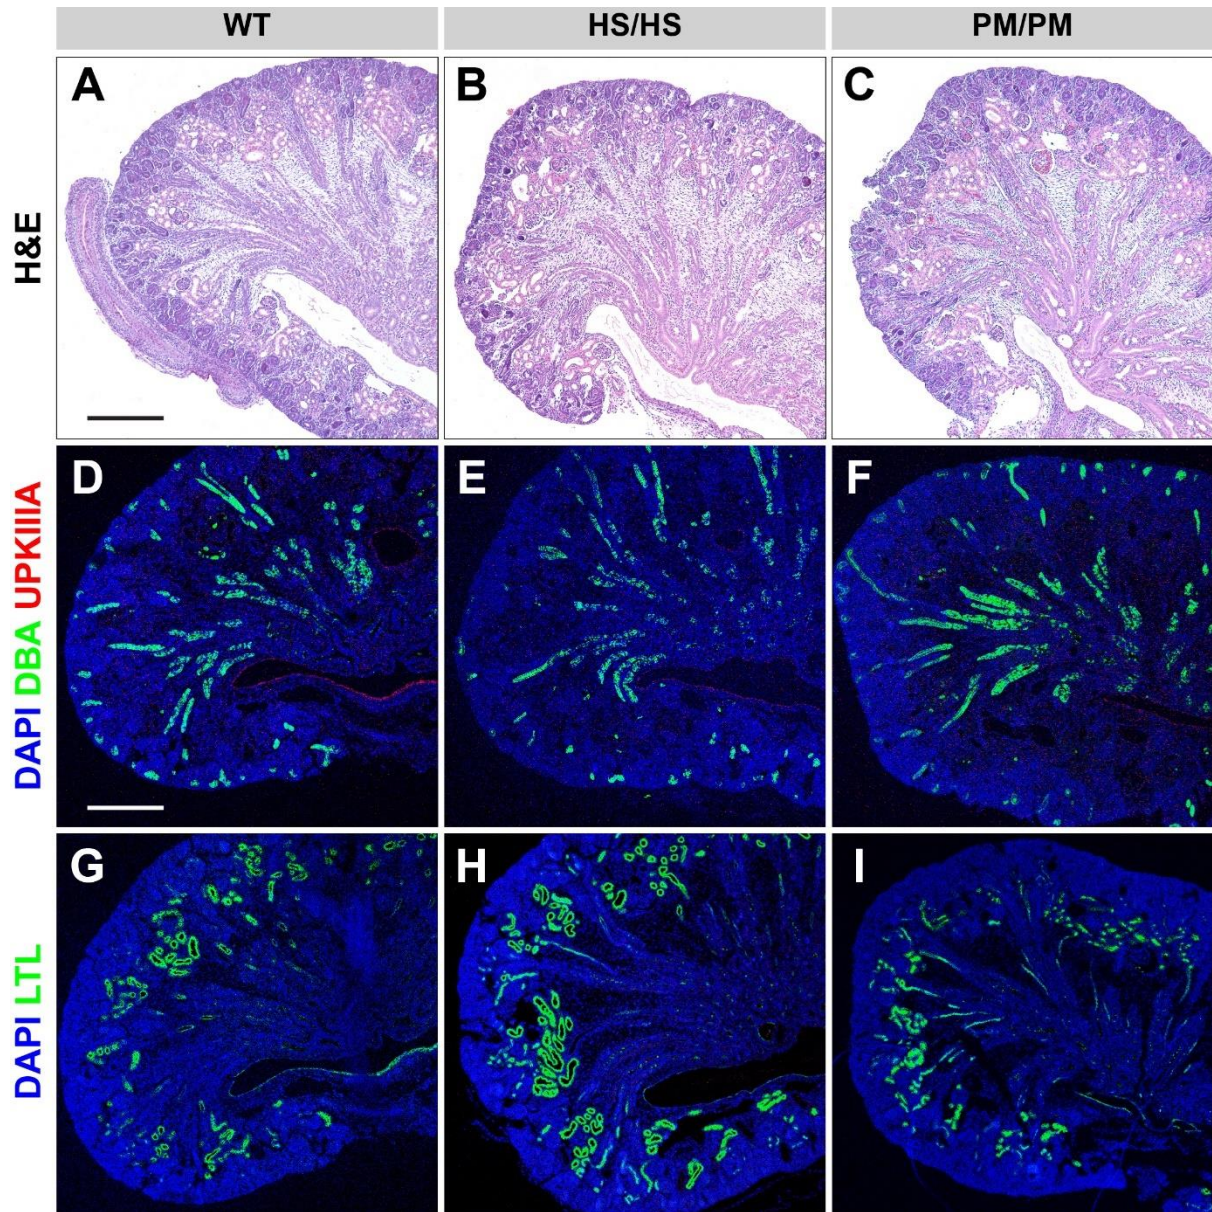

**Figure S2**

Patterning of the collecting duct and nephron segments in mice of different genotypes indicate that fetal kidney development is unaffected by the introduction of CRISPR mediated changes in *Lama5*.

Table S1: Homozygous candidate variants

| CHROM:POS:REF:ALT               | HGVS                                                  | Symbol   | Impact        | CADD <sup>1</sup> | GnomAD                 |                            |
|---------------------------------|-------------------------------------------------------|----------|---------------|-------------------|------------------------|----------------------------|
|                                 |                                                       |          |               |                   | Popmax AF <sup>2</sup> | Hom Alt count <sup>3</sup> |
| 4:71394470:G:A                  | <u>NM_212557.4:c.325G&gt;A (p.Ala109Thr)</u>          | AMTN     | Missense      | 22.7              | 0.00609089             | 3                          |
| 6:126236629:G:A                 | <u>NM_181782.5:c.2244+3G&gt;A</u>                     | NCOA7    | Splice Region | 14.2              | 0.00137387             | 0                          |
| 9:71836037:C:T                  | <u>NM_001170416.2:c.670C&gt;T (p.Arg224Trp)</u>       | TJP2     | Missense      | 23.0              | 0.000225225            | 0                          |
| 9:79322098:T:C                  | <u>NM_015225.3:c.5092A&gt;G (p.Ile1698Val)</u>        | PRUNE2   | Missense      | 0.0               | 3.27E-05               | 0                          |
| 9:84205855:C:T                  | <u>NM_005077.5:c.1694G&gt;A (p.Arg565His)</u>         | TLE1     | Missense      | 31.0              | 8.79E-06               | 0                          |
| 12:25261759:T:TAAAAAAAAAAAAAAAA | <u>NM_018272.5:c.1894-16_1894-3dupTTTTTTTTTTTTTTT</u> | CASC1    | Splice Region | 12.6              | n.f.                   | n.f.                       |
| 12:108988326:C:CAAAAAAAAAAAAA   | <u>NM_181724.3:c.-14-2163_-14-2154dupTTTTTTTTTTT</u>  | TMEM119  | Splice Region | 0.6               | n.f.                   | n.f.                       |
| 13:32367033:C:G                 | <u>NM_130806.5:c.1594C&gt;G (p.Arg532Gly)</u>         | RXFP2    | Missense      | 23.0              | 0.00155521             | 0                          |
| 13:45150143:G:C                 | <u>NM_183422.4:c.68C&gt;G (p.Ala23Gly)</u>            | TSC22D1  | Missense      | 26.0              | n.f.                   | n.f.                       |
| 13:46124056:T:C                 | <u>NM_182542.3:c.1618A&gt;G (p.Thr540Ala)</u>         | ERICH6B  | Missense      | 25.1              | 0.00530845             | 8                          |
| 14:73996946:C:T                 | <u>NM_203309.2:c.-72-7018G&gt;A</u>                   | HEATR4   | Splice Region | 0.4               | 0.00673563             | 0                          |
| 16:47005573:T:TAAAAAAAAA        | <u>NM_005880.4:c.139-97_139-90dupTTTTTTTTT</u>        | DNAJA2   | Splice Region | 3.9               | n.f.                   | n.f.                       |
| 19:9075370:T:C                  | <u>NM_024690.2:c.12076A&gt;G (p.Thr4026Ala)</u>       | MUC16    | Missense      | 0.0               | 0.00911944             | 8                          |
| 19:12991919:G:C                 | <u>NM_001375.3:c.134C&gt;G (p.Ala45Gly)</u>           | DNASE2   | Missense      | 9.1               | 0.00789852             | 5                          |
| 19:17445470:C:T                 | <u>NM_020959.3:c.10G&gt;A (p.Ala4Thr)</u>             | ANO8     | Missense      | 11.6              | 0.00865209             | 9                          |
| 20:5528409:G:C                  | <u>NM_019593.5:c.1917C&gt;G (p.Ser639Arg)</u>         | GPCPD1   | Missense      | 22.2              | n.f.                   | n.f.                       |
| 20:18295980:C:T                 | <u>NM_001083330.4:c.482C&gt;T (p.Thr161Ile)</u>       | ZNF133   | Missense      | 11.8              | 0.00466805             | 0                          |
| 20:60926966:C:A                 | <u>NM_005560.6:c.857G&gt;T (p.Arg286Leu)</u>          | LAMA5    | Missense      | 32.0              | n.f.                   | n.f.                       |
| 22:47164079:G:A                 | <u>NM_014346.5:c.62+5334G&gt;A</u>                    | TBC1D22A | Splice Region | 8.7               | 0.00331169             | 0                          |

- 1) CADD *In silico* damage prediction score. Scores > 20 are predicted to be damaging. CADD v1.6 (Rentzsch P et al, NAR, 2019).
- 2) Maximum population allele frequency observed in gnomAD v2.1.1 database.
- 3) Number of individuals in gnomAD v2.1.1 database homozygous for the variant.

Table contains all variants homozygous variants identified in the proband that meet all of the following criteria:

- PASS GATK VQSR quality filters.
- Homozygous in the proband and heterozygous in the probands mother.
- Maximum population Allele frequency < 0.01 (gnomAD v2.1.1).
- Fewer than 20 homozygous individuals observed in gnomAD v2.1.1.
- Predicted to alter the protein coding sequence of one or more gencode ts1l transcripts.

#### Reference

Rentzsch P, Witten D, Cooper GM, Shendure J, Kircher M. CADD: predicting the deleteriousness of variants throughout the human genome. *Nucleic Acids Res.* 2019 Jan 8;47(D1):D886-D894.
